# Supplementary material for: The origin of exceptionally large ductility in Molybdenum Alloys dispersed with Irregular-Shaped La2O3 Nano-Particles
Source: Research Square preprint supplement (doi:10.21203/rs.3.rs-3579699/v1), 2024-01-30
Supplement: Supplementary file 1 [file bd5fa6c5223ed7fb1e3eb10b.docx]

**Supplementary information**

**The origin of exceptionally large ductility in Molybdenum Alloys dispersed with Irregular-Shaped La2O3 Nano-Particles**

Yujie Chen1,2,#, Yan Fang1,#, Pengming Cheng3, Xiaoxing Ke4, Manchen Zhang4, Jiawei Zou1, Jun Ding5,*, Bozhao Zhang5, Lin Gu2,*, Qinghua Zhang6, Gang Liu3, *, Qian Yu1,*

1Center of Electron Microscopy and State Key Laboratory of Silicon Materials, Department of Materials Science and Engineering, Zhejiang University, Hangzhou 310027, China

2Beijing National Center for Electron Microscopy and Laboratory of Advanced Materials, School of Materials Science and Engineering, Tsinghua University, Beijing 100084, China

3State Key Laboratory for Mechanical Behavior of Materials, School of Materials Science and Engineering, Xi’an Jiaotong University, Xi’an 710049, China

4Faculty of Materials and Manufacturing, Beijing University of Technology, Beijing 100124, China

5Center for Alloy Innovation and Design State Key Laboratory for Mechanical, Xi’an Jiaotong University, Xi’an 710049, China

6Beijing National Laboratory for Condensed Matter Physics, Collaborative Innovation Center of Quantum Matter, Institute of Physics, Chinese Academy of Sciences, Beijing 100190, China

#These authors contributed equally: Yujie Chen, Yan Fang

Correspondence should be addressed to: yu_qian@zju.edu.cn; dingsn@xjtu.edu.cn; lingu@mail.tsinghua.edu.cn; lgsammer@mail.xjtu.edu.cn.


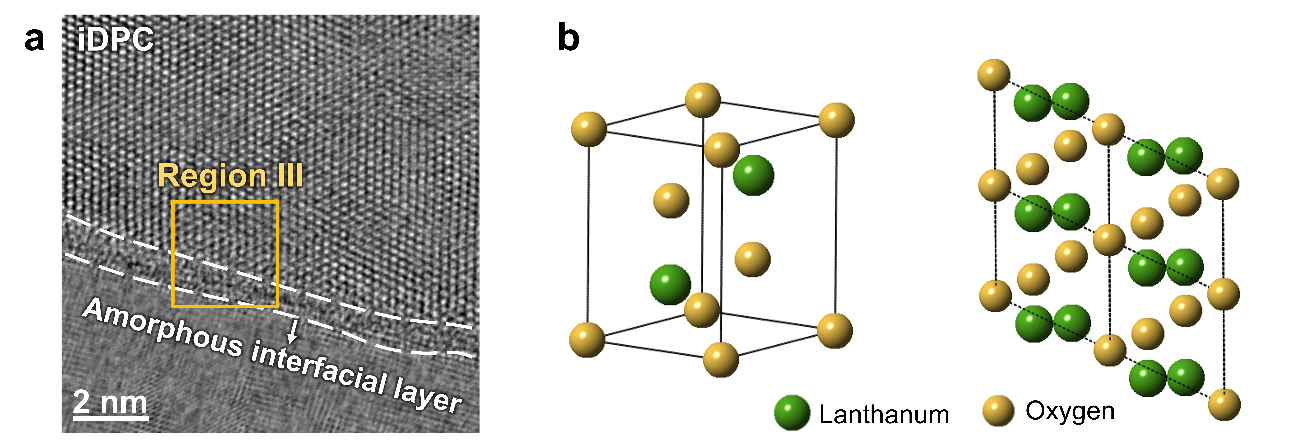


**Extended data Fig. 1|The atomic-scale structure of La2O3 nanoparticle at the interface. a,** The iDPC-STEM image showing the atomic-scale structure of the La2O3 nanoparticle.Thehigh-resolution iDPC-STEM image in Fig. 1e is acquired at the location of Region III, which is marked by the orange square. **b,** The perfect crystal structure model of the La2O3 nanoparticle. The perfect crystal structure model of La2O3 is provided by CrystalMaker software and has the space group of P.


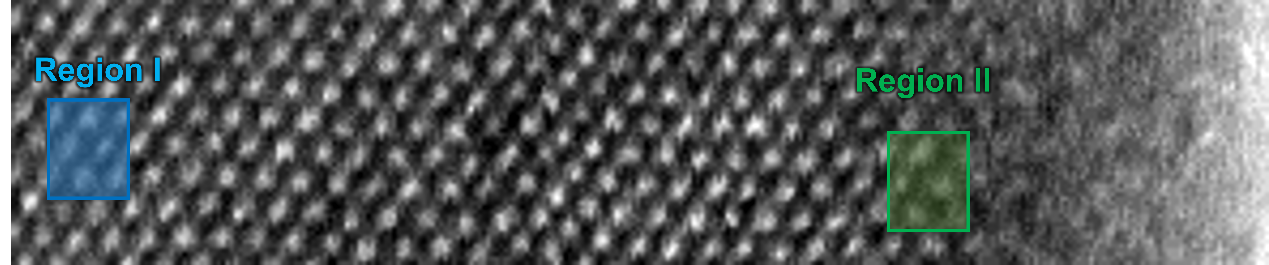


**Extended data Fig. 2|HAADF-STEM image and the region where the EELS spectrum taken from.** Region I (blue rectangle) is in the internal La2O3 particle. Region II (green rectangle) is in proximity to the amorphous layer.


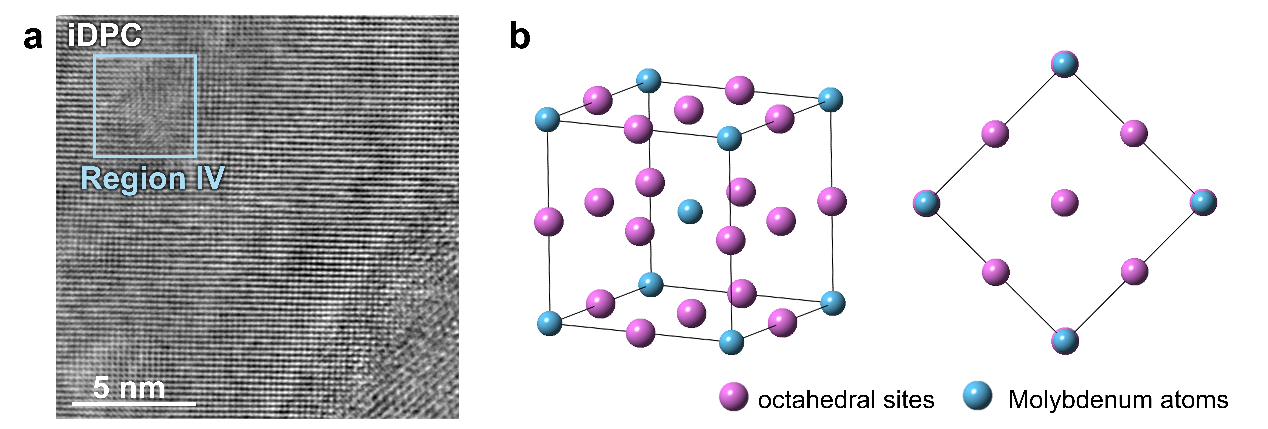


**Extended data Fig. 3|The atomic-scale structure of Mo matrix near La2O3 nanoparticle. a,** The iDPC-STEM image showing the aggregation of oxygen atoms near the particle-matrix interface in the Mo matrix. Region IV (marked by light blue square) is the typical cluster of oxygen atoms, which is magnified as Fig. 1f. **b,** The crystal structure model of the Mo matrix, with the oxygen atoms occupy octahedral interstitial sites.


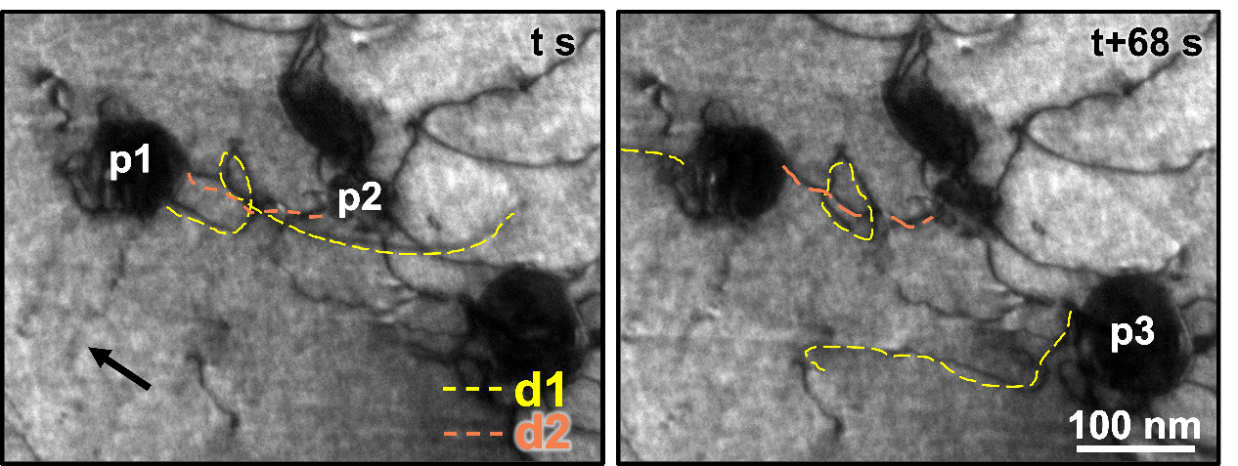


**Extended data Fig. 4|Dislocation interactions at room temperature with the participation of particle.** Particle1 and 2 are marked by p1, and p2, respectively. Dislocation 1 and 2 (marked by yellow and orange dashed lines) were pinned by particle 1 and 2 (marked as p1 and p2), respectively. Their interaction produced a dislocation loop and two single armed dislocations attached to p1 and particle 3 (marked as p3), respectively.

**
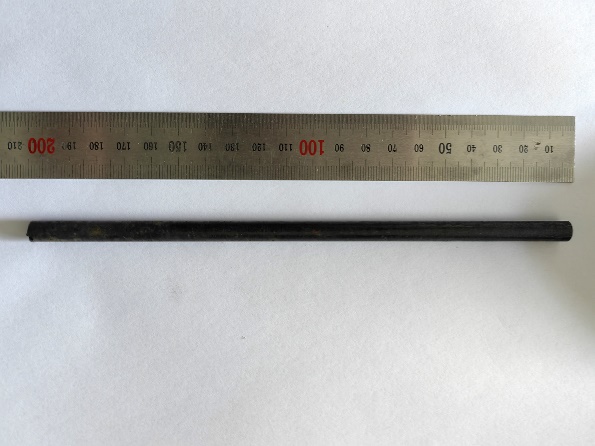
**

**Extended data Fig. 5|A bar of Mo-La2O3 alloy after the process of rotary swaging.**


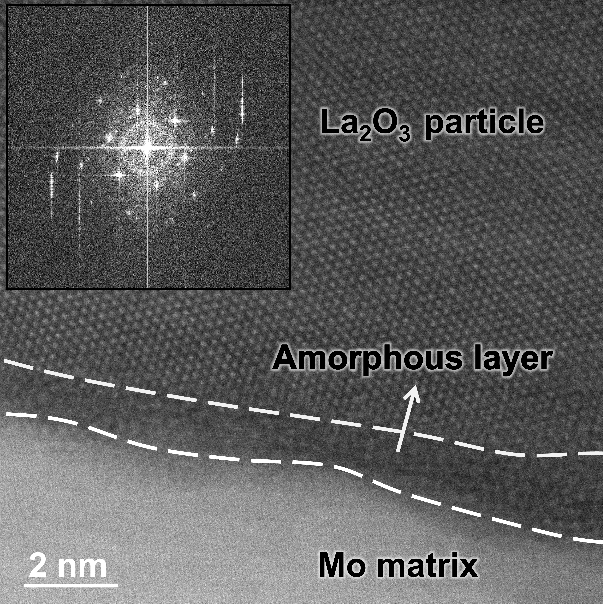


**Extended data Fig. 6|HAADF-STEM image of the amorphous interface after the treatment of rotary-swaging.**


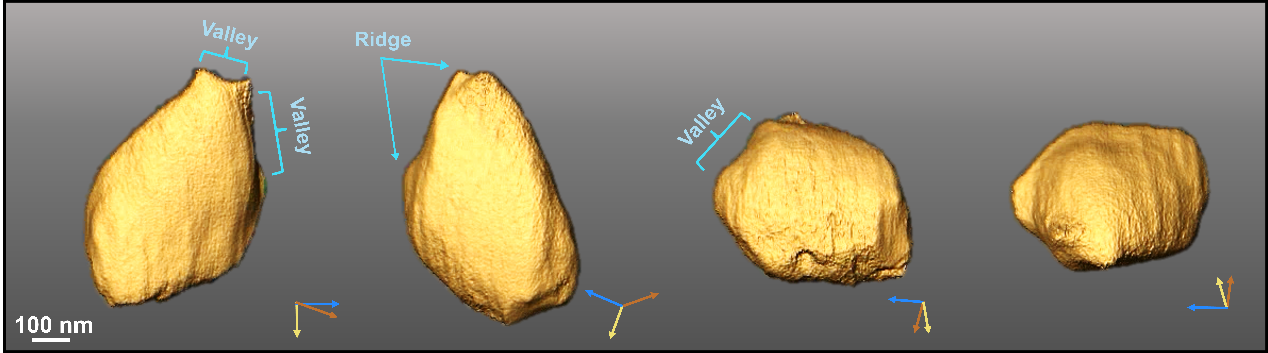


**Extended data Fig. 7|The three-dimensional tomography of the La2O3 particles, with the long axis of approximately 500 nm.**


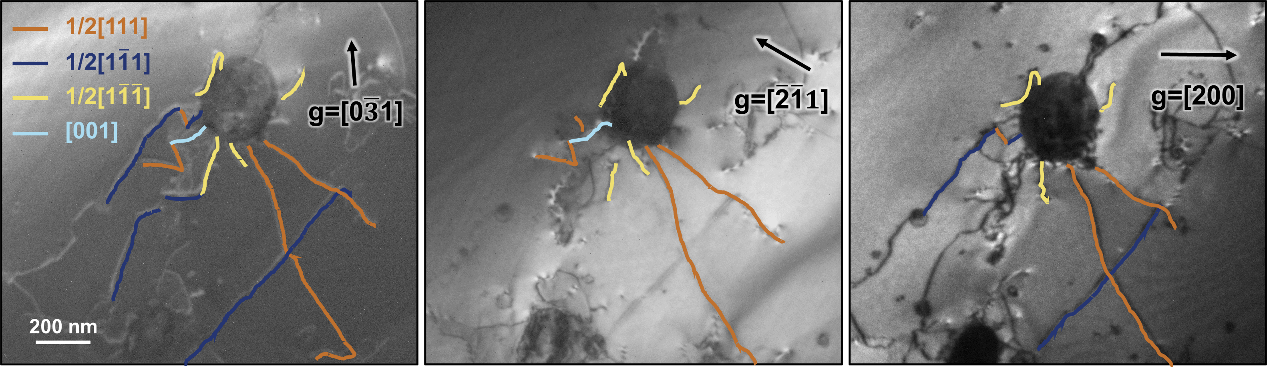


**Extended data Fig. 8|The center dark-field TEM image with different diffraction vectors.**


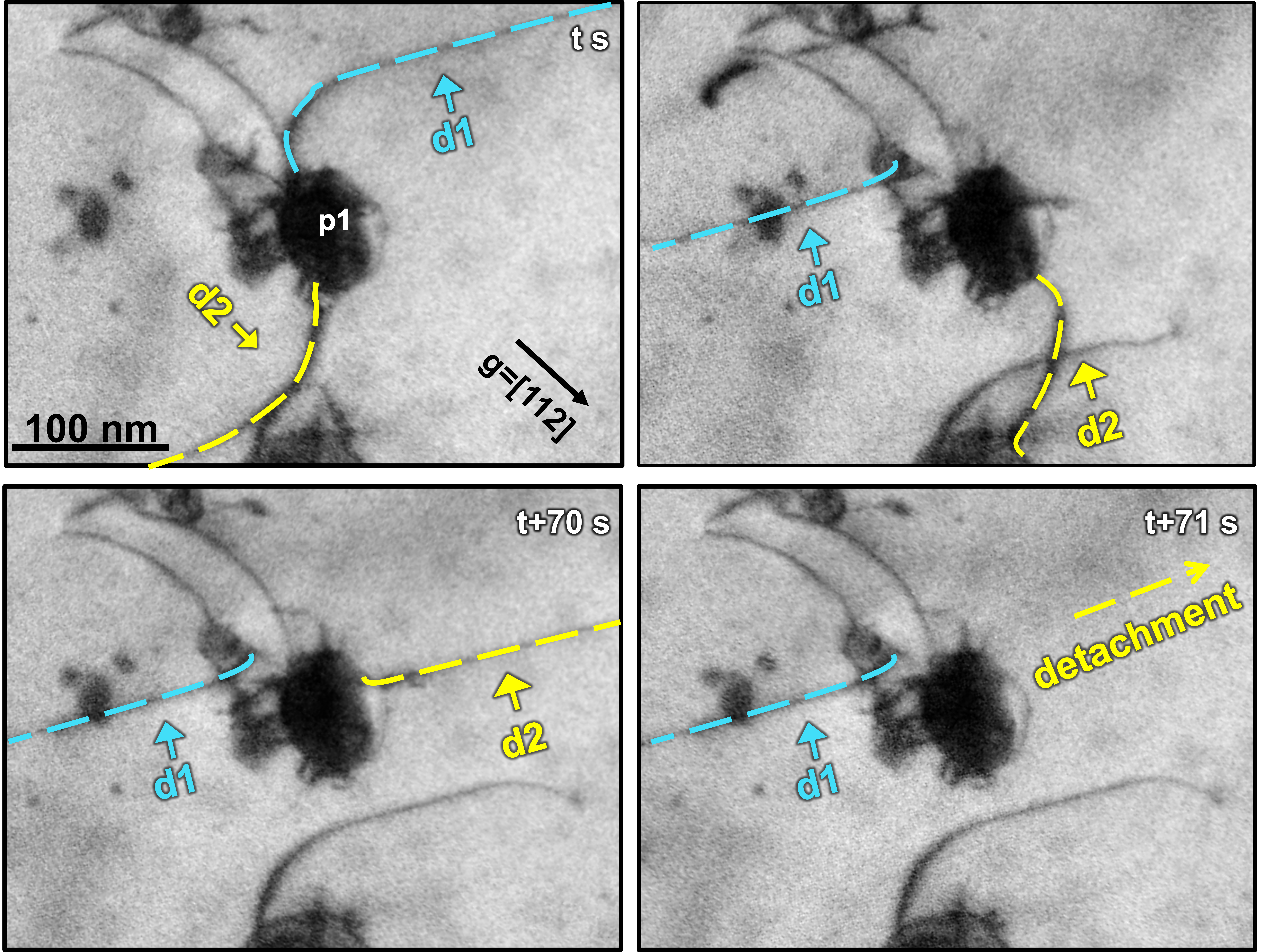


**Extended data Fig. 9| *In situ* TEM straining experiments on the Mo-La2O3 alloy processed by rotary swaging.** Dislocation 1 and 2 (marked as d1 and d2 by blue and yellow dashed lines, respectively) are first pinned at the interface of particle 1 (marked as p1) with one end. d1 and d2 function as single arm sources. After several cycles, d1 and d2 detach from the surface of p1 and keep gliding.

**Supplementary video 1** *In Situ* TEM tensile observation on sintered Mo-La2O3 alloy at room temperature.

**Supplementary video 2** Molecular dynamics simulation showing edge dislocations in Mo gliding across the embedded amorphous spherical MoPd particles with periodic boundary condition.

**Supplementary video 3** Molecular dynamics simulation showing edge dislocations in Mo gliding across the embedded amorphous spherical MoPd particles with two additional notches.

**Supplementary video 4** The three-dimensional tomography of the La2O3 particle with particle size of approximately 100 nm.

**Supplementary video 5** The three-dimensional tomography of the La2O3 particle with particle size of approximately 400 nm.

**Supplementary video 6** The three-dimensional tomography of the particles and dislocations accumulated at the interface.

**Supplementary video 7** *In situ* TEM tensile observation of the formation of Frank-Read dislocation sources at room temperature.

**Supplementary video 8** *In situ* TEM tensile observation of the formation of Frank-Read dislocation sources at -50 °C.
